# Supplementary material for: Polyacrylic acid-reinforced organic–inorganic composite bone adhesives with enhanced mechanical properties and controlled degradability
Source: Royal Society of Chemistry journal article supplement (doi:10.1039/d4tb00857j), 2024-01-01
Supplement: d4tb00857j1.pdf [file d4tb00857j1.pdf]

## Supporting Information

### **Polyacrylic acid-reinforced organic-inorganic composite bone adhesives with enhanced mechanical properties and controlled degradability**

**Pianpian Zheng<sup>a,b,c,#</sup>, Junjie Deng<sup>a,b,#</sup>, Lei Jiang<sup>d</sup>, Ning Ni<sup>d</sup>, Xinqi Huang<sup>e</sup>, Zhihe Zhao<sup>e</sup>, Xiaodong Hu<sup>f</sup>, Xiao Cen<sup>e,\*</sup>, Jianming Chen<sup>d,\*</sup>, Rong Wang<sup>a,b,c,\*</sup>**

<sup>a</sup>Laboratory of Advanced Theranostic Materials and Technology, Ningbo Institute of Materials Technology and Engineering, Chinese Academy of Sciences, Ningbo, 315201, P. R. China

<sup>b</sup>Zhejiang International Scientific and Technological Cooperative Base of Biomedical Materials and Technology, Ningbo Cixi Institute of Biomedical Engineering, Ningbo, 315300, P. R. China

<sup>c</sup>University of Chinese Academy of Sciences, Beijing, 101408, P. R. China

<sup>d</sup>Ningbo No. 6 Hospital, Ningbo, 315042, P. R. China

<sup>e</sup>State Key Laboratory of Oral Diseases, National Clinical Research Center for Oral Diseases, West China Hospital of Stomatology, Sichuan University, Chengdu 610041, P. R. China

<sup>f</sup>Health Science Center, Ningbo University, Ningbo, 315211, P. R. China

# P. Zheng and J. Deng contributed equally to this work.

Corresponding authors: X. Cen, Email: cenx@scu.edu.cn; J. Chen, Email: cjmdn01710@163.com; R. Wang, Email: rong.wang@nimte.ac.cn

**Table S1.** Primer sequences.

| Primer           | Primer sequences (5' to 3') | Product size (bp) |
|------------------|-----------------------------|-------------------|
| CoL1a1-F         | AGCACGTCTGGTTTGGAGAG        | 111               |
| CoL1a1-R         | ACATTAGGCGCAGGAAGGTC        |                   |
| RUNX2-F          | GACACTGCCACCTCTGACTT        | 160               |
| RUNX2-R          | CTGGGTAGTGCATTCGTGGG        |                   |
| $\beta$ -actin-F | ACTGTCGAGTCGCGTCC           | 227               |
| $\beta$ -actin-R | CTGACCCATCCCCACCATCA        |                   |

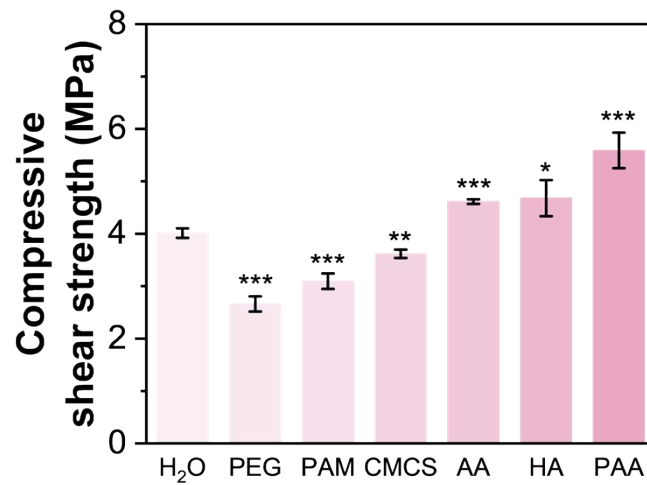

**Figure S1.** Compressive shear strength of titanium alloys bonded by adhesives incorporated with different polymers after incubation in deionized water at room temperature for 24 h (\* denotes significant difference ( $p < 0.05$ ) compared with adhesive prepared with H<sub>2</sub>O (i.e., OTH)).

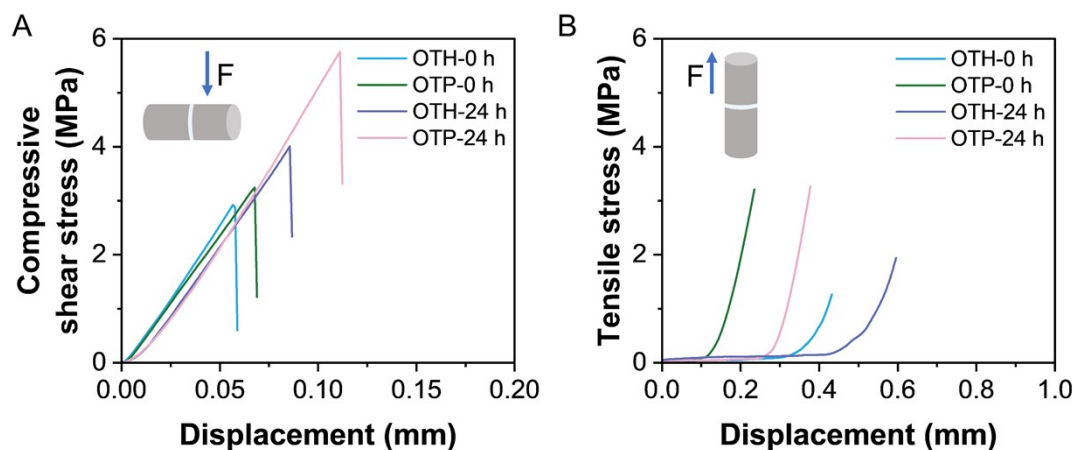

**Figure S2.** (A) Compressive shear stress-displacement curves, and (B) tensile stress-displacement curves of titanium alloys bonded by OTH and OTP adhesives before and after soaking in deionized water at room temperature for 24 h.

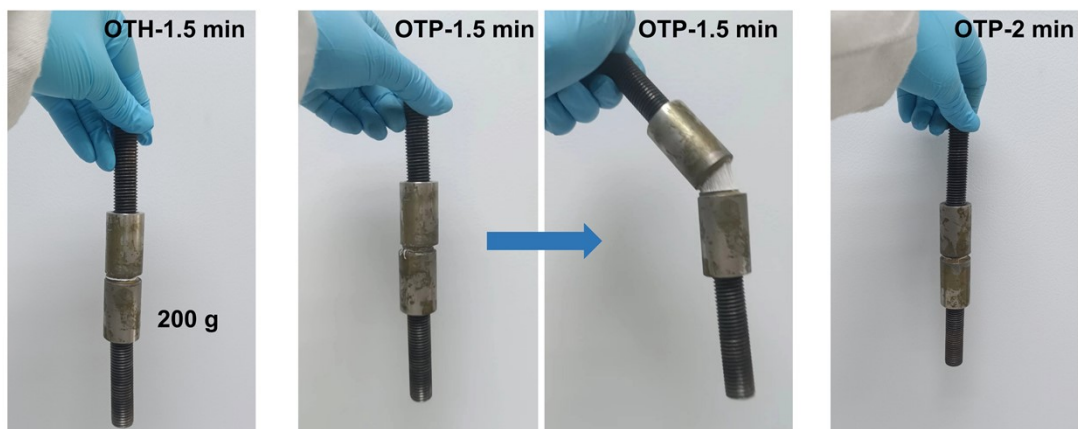

**Figure S3.** Digital photograph of OTH and OTP bonded titanium alloy surface after curing for different periods.

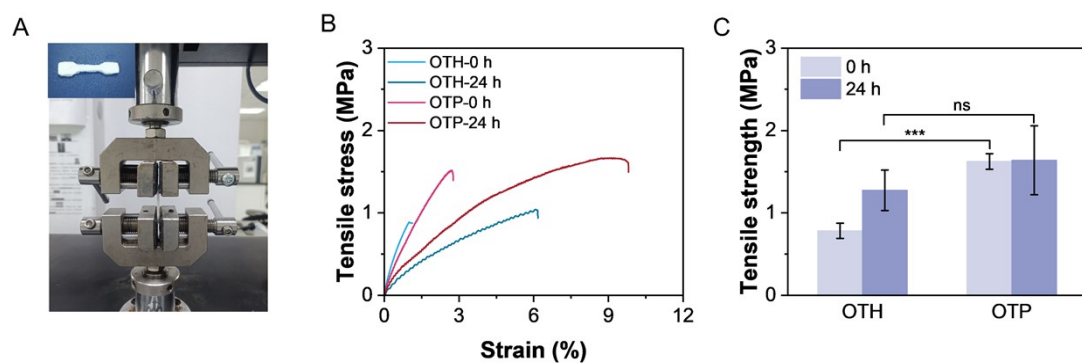

**Figure S4.** (A) Digital photograph of the setup for tensile test, inset showing the adhesive sample. (B) Tensile stress-strain curves, and (C) tensile strength of OTH and OTP adhesives before and after soaking in deionized water at room temperature for 24 h.

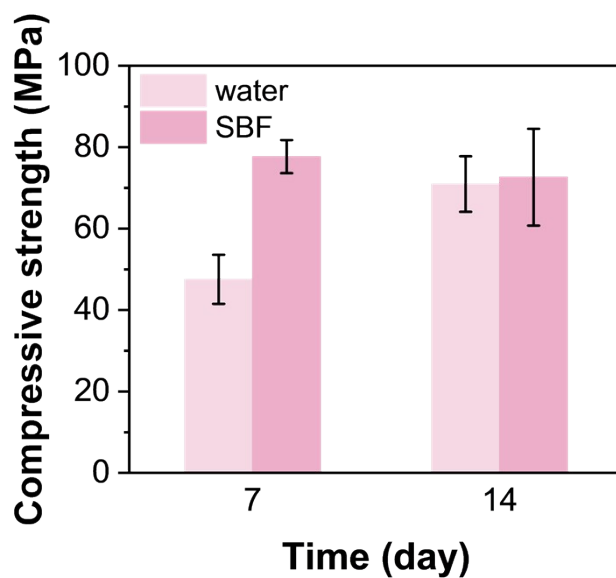

**Figure S5.** Compressive strength of OTP adhesives after incubation in SBF at 37 °C or in deionized water at room temperature for 7 and 14 days.

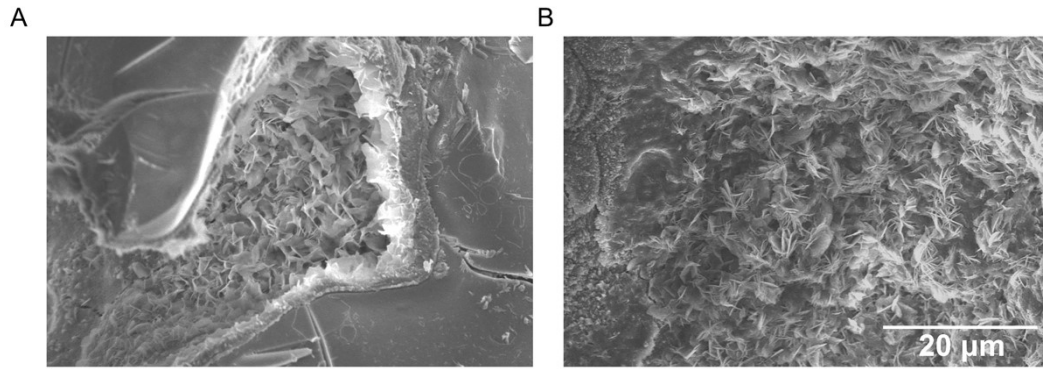

**Figure S6.** Formation of flake HAP on (A) OTH and (B) OTP after incubation in SBF at 37 °C for 14 days.

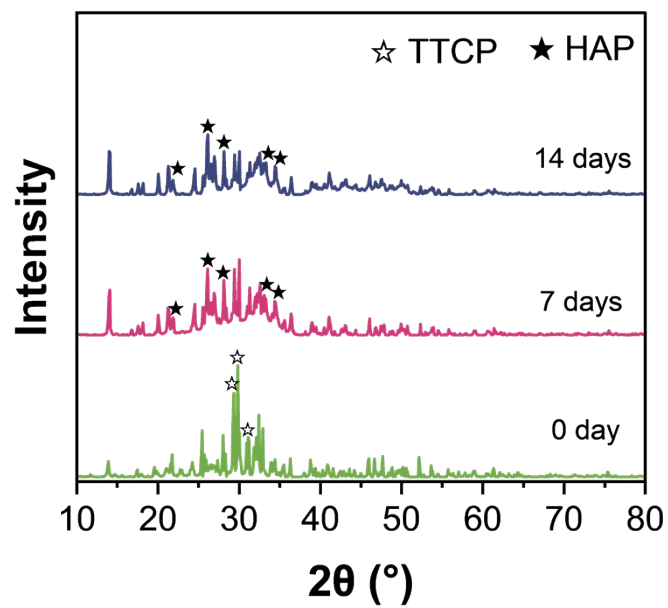

**Figure S7.** XRD results of OTH adhesive before and after incubation in SBF at 37 °C.

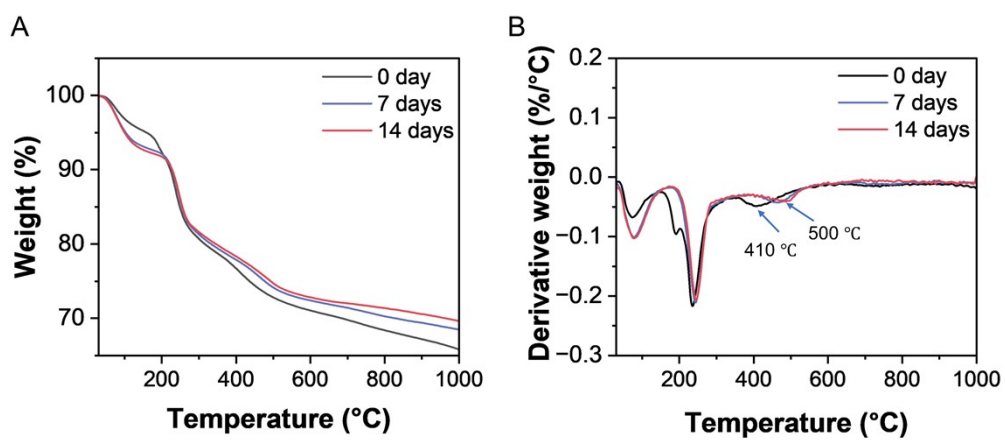

**Figure S8.** (A) Thermal gravimetric analysis (TGA) curves and (B) derivative thermal gravimetric (DTG) curves of OTP before and after incubation in SBF at 37 °C.

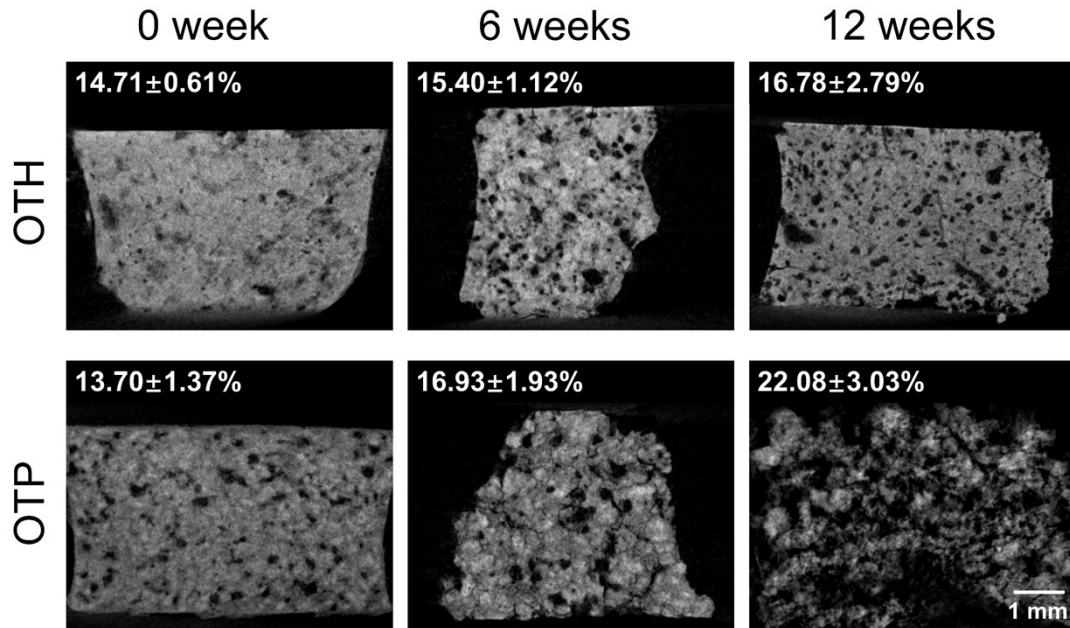

**Figure S9.** Representative micro-CT scanning images and the corresponding porosity of OTH and OTP adhesives before and after incubation in SBF at 37 °C for 6 and 12 weeks.

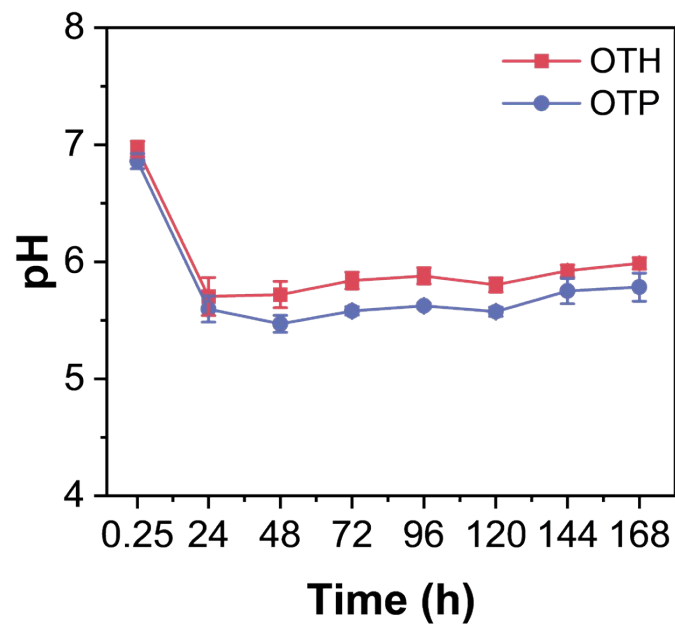

**Figure S10.** Change in pH of PBS soaked with OTH or OTP adhesives.

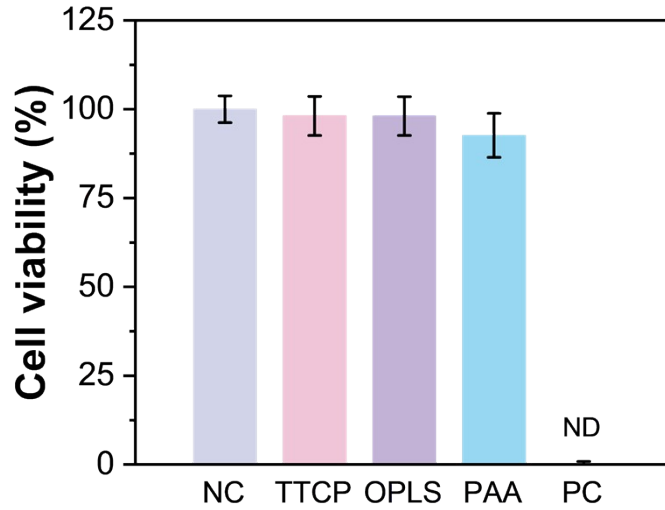

**Figure S11.** Cell viability of MC3T3-E1 cells after cultured in medium containing TTCP (5 mg/mL), OPLS (3 mg/mL), and PAA (1 mg/mL) for 1 day. NC: negative control, PC: positive control, ND: not detected.

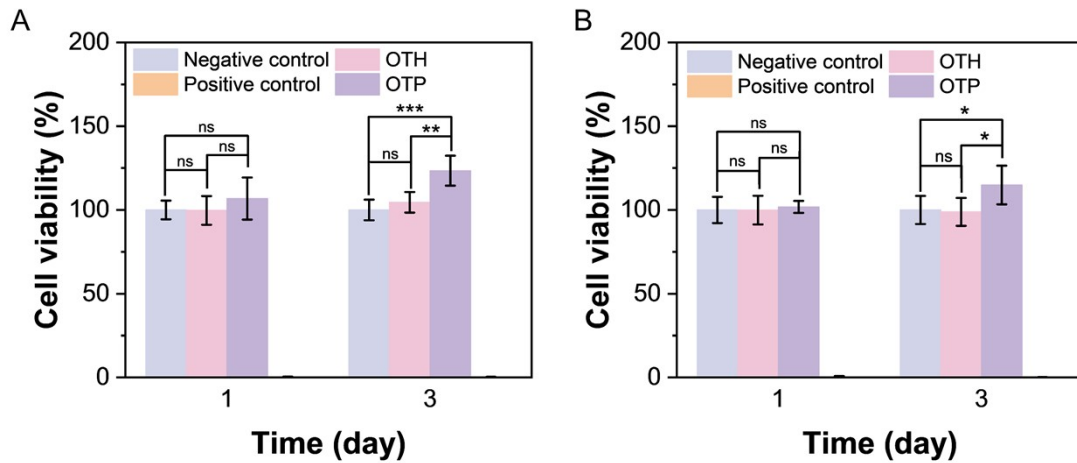

**Figure S12.** OTH and OTP adhesives incubated in deionized water for (A) 7 days, and (B) 14 days and then co-cultured with MC3T3-E1 cells for 1 and 3 days.
